# Supplementary material for: Pre-illness data reveals differences in multiple metabolites and metabolic pathways in those who do and do not recover from infectious mononucleosis
Source: Royal Society of Chemistry journal article supplement (doi:10.1039/d2mo00124a), 2022-05-25
Supplement: d2mo00124a2.csv [file d2mo00124a2.csv]

dx	C03742	C00236	C02918	C02455	C00631...C00197	C04640	C01159.C03339	C02261...C03665	C02630	C05984	C00141	C06255	C00322	C00109	C01089...C00989	C05593...C00642...C00755	C02230...C02242	C05580	C10447	C05145	C00632	C02794	C01013	C05587	C03232	C01005	C02642	C01179	C01157...C00430...C01073	C03492	C01181	C05578	C02376	C00440	C00170	C02378	n.a	n.a.1	C00345	C01236	C00164...C00232	C01996	C00024	C00417.C02341	C00147	C00212	C03794	C00008...C00361	C00498
CFS-R	10.1253102318829	0	11.2063595430167	15.3409025103922	16.939350209485	13.3699325788483	8.81388455802561	20.3138000101249	0	19.6208641535826	20.8306878307972	18.5657048429512	14.6614092971806	18.7054850671529	20.8084686471313	17.7167424279621	15.6438900859325	0	8.66673325868581	0	14.8723152971679	12.8947573841901	0	0	11.2630785308215	13.2947558031204	12.4131030749449	10.7102981837915	17.1468878689617	0	16.6267454292885	10.8988112516983	15.090951567609	0	14.1945112180417	0	19.1605451702415	8.58997886114189	13.7338025477772	9.14526837523247	16.4369624603846	15.3422968123716	11.1209415755006	16.5573612323006	16.0319654855877	14.2623325575098	0	17.4721543823285	0
CFS-R	10.7869037913362	0	13.5917805847383	15.6894191302413	16.4238585015274	14.3626372522566	8.81388455802561	19.4599373595146	0	19.2232516561164	20.7229877102728	18.5339115137515	14.9569971337588	18.3668655564745	20.1211825735647	16.7900270602042	15.6905298620506	0	10.599281228037	0	14.6456362455173	12.0403780908326	0	0	11.2630785308215	13.3022335987958	12.5160065494099	11.0310597586485	17.0117683937218	0	16.4397423155987	11.9328915899412	14.9232652604494	0	13.9648844183628	0	18.2002982399366	8.58997886114189	13.4304919874446	9.14526837523247	16.4233861805687	14.2064134836279	12.3822252131786	15.4476013456015	15.8666423844684	14.4618061441136	0	16.4142625750323	0
CFS-R	11.5733053509589	0	13.4715402811657	15.425027467278	16.0639941013211	14.7773014765336	10.1036490274584	19.22202155062	0	19.2181402810432	20.8269721548733	18.6043047438656	15.3527839316309	18.7256746604501	20.1945756037139	16.8859651649135	15.4837815589653	0	10.5751301583086	0	14.6819326643386	10.037187680924	0	0	11.2630785308215	12.0626236643736	12.2499842622485	11.1298038710165	16.5259493707276	0	16.5933025944544	11.1624597750807	14.5187580581285	0	13.7297086311131	0	18.513294272878	8.58997886114189	11.8654889685092	9.14526837523247	16.1318415418288	14.1824344020413	12.9144950633423	15.1163311775089	15.9702319830558	14.2729404682815	0	14.9172878327755	0
CFS-R	9.77582462104597	0	12.3778260556621	14.9792596262776	15.5054773983092	14.22468942818	8.81388455802561	19.452304098338	0	19.6123512179817	20.7653070514358	18.6203997585281	14.8357244529999	19.1197756715451	20.6078802196846	17.3507495812185	15.4805846707034	0	11.6279937077979	0	14.5670455075085	11.6310728786773	0	0	11.2630785308215	12.360119034205	12.0886001866398	10.500729376209	16.328133455928	0	15.8936752848629	10.6335691808891	14.7003580932405	0	13.4939490025588	0	18.9434486301895	8.58997886114189	11.6492118092282	9.14526837523247	16.7455545830308	13.1952420228169	13.3009245394346	15.3732569914827	15.975816162221	14.3594184779078	0	15.0545124180942	0
CFS-R	10.1781603703943	0	14.2120970340782	15.1405428910425	15.8803937644778	14.8517586710025	8.81388455802561	19.6967493287601	0	19.8312419611875	20.8954641840195	18.8114208899753	15.3734482072258	18.8264620820546	20.9018379525292	16.9578442011625	15.6345196929372	0	11.24567327403	0	14.2469766906111	12.0394393814005	0	0	11.2630785308215	11.9636825622701	12.4383543167554	8.43424627059531	17.0035994102985	0	16.7393182202504	10.2444141395067	14.5379898160365	0	13.2958241262661	0	17.6558014006134	8.58997886114189	12.5819578845082	10.3364381175792	16.0942098428137	13.8673902303986	13.460013491484	15.2991017605324	15.9217939862553	13.8153065371534	0	15.5010105891063	0
CFS-R	10.798697640799	0	13.2305449102489	15.9698466552171	16.4126697934384	15.0497062158455	8.81388455802561	20.0917533862249	0	19.4431511390913	20.8695437520133	18.645971340714	14.7757534841676	19.1886108174272	20.5995902869771	17.0491647232366	15.9060313722106	0	10.9061211046323	0	14.9622159425093	13.3265377460109	0	0	11.2630785308215	13.1456579400074	12.4940634203285	11.0963336843903	16.9283334497312	0	16.8474842552237	11.2788220734197	15.0255106615732	0	13.5128136583873	0	18.9397623173835	8.58997886114189	12.099389032743	9.14526837523247	17.0976246590178	14.03702237873	12.7413635389729	15.3233094657646	15.8750090524895	14.0934975344877	0	15.3543622587904	0
CFS-R	9.66706877402189	0	13.0150787896842	15.2490980108187	16.1768133262958	14.1492261413631	8.81388455802561	19.4434067489256	0	19.3248760765182	20.9059663144408	18.5685070556282	15.4534420452925	18.3230306707314	20.5305229724671	16.9949829649897	15.718637415413	0	12.5585517994399	0	14.8022537888839	12.3501859764326	0	0	11.2630785308215	12.097807916725	12.2682067157912	9.68053148364599	17.8104834503529	0	16.6450306196535	9.81208472906278	15.067449186785	0	13.9729808645856	0	17.2230753247352	8.58997886114189	11.782868629192	9.14526837523247	16.8403986885106	14.5295749405296	12.9265066318254	15.6029850263418	15.9101278630243	14.4493195389118	0	16.0040346175499	0
CFS-R	11.0479810164604	0	13.4965263111472	14.9588756653305	16.5903328464368	14.0742559746013	8.81388455802561	19.0371937017652	0	19.1988159225173	20.7284585753136	18.7678382463878	15.2150115760114	18.3023658481334	20.1260922415433	17.218326096371	15.5371191640632	0	10.0853923558337	0	14.401505618902	11.4002045949061	0	0	11.2630785308215	12.6267120396092	12.3350769312524	10.3171522849872	16.4188413711757	0	16.0688489976136	12.192708745072	14.880833521301	0	13.0187746245807	0	18.3745384445927	8.58997886114189	11.377392069675	9.14526837523247	16.7731342876754	13.8018030377064	13.055447632909	15.4702122336422	15.8463379762286	14.124673994903	0	15.390440251979	0
CFS-R	10.3922822682313	0	14.0853911195502	14.9968566991559	16.413461552043	14.3649975076865	8.81388455802561	19.2713753075774	0	19.2511646240142	21.0576180393108	18.902654352544	15.6992399375332	18.7066504185875	20.6746813976642	16.9210221448935	15.572276327616	0	10.8938091107312	0	14.6630898073293	13.6393209622103	0	0	11.2630785308215	11.8674060029604	11.8868104627026	8.43424627059531	16.8387543453195	0	16.5552016640716	11.4657919278362	14.6970545535086	0	14.0484056084848	0	18.8173546423668	8.58997886114189	11.9050824110147	9.14526837523247	17.5524911770374	14.6441374818802	12.8978513902087	15.2646254809995	15.8500513556144	14.4116516715158	0	15.4710821568723	0
CFS-R	10.9519637717104	0	14.1343445803993	15.5471128273672	16.4056271620763	15.0378490753665	8.81388455802561	19.5297745260122	0	19.0962631582362	20.6962769154807	18.3017871230745	15.0867781127855	18.5116841994824	20.6467966796956	16.880653075893	15.798104826617	0	12.7908130084959	0	14.5828208877271	11.2690816335901	0	0	11.2630785308215	12.1141985556017	12.1394305801606	9.66599149499752	16.924406860413	0	16.9198100651558	10.2137624736405	14.8086660300415	0	13.5577056836626	0	18.1796639129533	8.58997886114189	11.9382977700704	9.83841555579241	17.5198235745819	14.8314920427252	12.8392548304225	15.4474185173576	16.468832237704	14.2445496043995	0	15.6338530469585	0
CFS-R	10.4334391041006	0	12.2409087603656	15.2353779834805	15.9123017207792	14.3937720016413	8.81388455802561	19.4291702930857	0	19.2071730794647	20.5824474534338	18.2138281465146	14.9698558376323	19.0838844448419	20.4441476812544	17.1372603936979	15.9237298930942	0	12.4891516400553	0	14.5970783304372	12.8750603213725	0	0	11.2630785308215	13.5619142424436	11.5434352711748	11.8146139875259	16.7080562289759	0	16.466116021887	9.97422556704147	15.1547463298731	0	13.8340251011342	0	19.0313081343182	8.58997886114189	10.7084444081481	9.14526837523247	16.9309646088222	13.6957524481324	13.6280996724791	15.2629374119123	15.8184135992251	14.2840612572182	0	15.0497356133609	0
CFS-R	10.430609664269	0	13.6981550559024	15.5795226034138	16.1479365493293	14.7129323864863	8.81388455802561	19.4651117685513	0	18.9721510069921	20.6666161627353	18.3119720293269	15.4276526109126	19.1223864704503	20.435826332406	17.1263143767617	15.6176699269413	0	11.4685346096354	0	14.9329792747893	12.1955474494737	0	0	11.2630785308215	12.7548990078137	12.0073167822728	9.82585028280898	17.2982673734122	0	16.2166270914724	10.4106364253297	14.8015127830549	0	13.320377820878	0	18.2295620051734	8.58997886114189	12.4049767815446	9.14526837523247	16.8335021445717	14.1059171654973	11.8140887560606	15.3434357661424	15.827891734663	13.5602298457969	0	14.9716096880156	0
CFS-R	9.6912221193691	0	13.3605846858849	15.3063655899514	16.1679114794304	13.5356458501404	9.69233432907347	18.9330242191988	0	18.209235190975	20.6336956387826	18.5550558380607	15.429281469385	17.8907724486598	19.5684794135238	16.8552980415595	15.5979598214154	0	10.2400312151779	0	14.0295503959435	12.2318037430986	0	0	11.2630785308215	12.4427679555561	11.7155070607715	11.2668970411186	16.9483886591954	0	16.2012649733662	11.4638402572797	15.2781708757853	0	13.4198229935052	0	17.982457060033	8.58997886114189	11.7195005135649	9.14526837523247	17.2599422860846	14.5026758828466	13.2424371207188	14.8296159671327	15.5788451751195	14.3667444586812	0	15.4715825977041	0
CFS-R	8.97392159346194	0	12.3878232060034	16.067884823124	16.7689578924162	14.433354282834	8.81388455802561	19.0114685343024	0	18.5400873054216	20.8041607985791	18.5977289795292	14.8350767532849	17.9314209470342	19.7956174428176	17.1411722102507	15.6030069531913	0	11.8020215372529	0	14.4419991048689	12.0198755886778	0	0	11.2630785308215	12.5987530430567	11.6434184964468	9.12739345115526	16.5179095543797	0	16.4607734503277	11.1595166101225	15.1659292649774	0	13.6235422202412	0	17.8882102339728	8.58997886114189	12.6954039118311	10.4334391041006	16.9880996504611	15.0263637381252	13.2130227589932	15.7651696708646	16.0137300846187	14.119279539444	0	16.3436488567219	0
CFS-R	10.9427920603054	0	12.4747056816648	15.5342372204308	15.5895530035122	14.82043944291	9.68340182132116	19.08986228911	0	18.0435412508384	20.8730589067384	18.4525551156197	15.5545984149399	18.9517581470718	20.010589191778	17.1467994705365	15.7643029778548	0	12.068521756973	0	14.7566679360646	11.557898830613	0	0	11.2630785308215	12.5844816836148	11.2420480663874	12.0910937994565	16.5241366598704	0	16.2657545044052	9.00908061416198	15.0640184866037	0	13.5720341888277	0	18.3095647193053	8.58997886114189	12.2090980643319	9.14526837523247	16.5375846957011	13.977443165609	13.418746981482	15.2188493342434	15.9821156629695	14.7714980435126	0	14.7831147440228	0
CFS-R	11.6559603064328	0	14.048671764598	15.0256534878551	16.0806585462294	14.8181859371407	9.61206516046862	19.9398468404833	0	19.6261936137684	20.7478052504853	18.3463868575946	15.3884214061134	19.1643534154642	21.1951236848158	17.239728521005	15.6337004784594	0	11.5182313637604	0	15.0934326504257	12.5827609788669	0	0	11.2630785308215	13.3212158754924	11.8319681135519	9.36922269703637	17.5182733164634	0	16.6824371693051	10.8983491402103	15.2435707080903	0	14.038313251193	0	17.6859496953869	8.58997886114189	9.95384791187508	9.14526837523247	15.3334841756882	14.9926749053791	12.4478809220735	15.5798296262202	16.4605264571348	12.5693919666246	0	15.5127545648497	0
CFS-R	11.1300971992676	0	13.7400593764163	15.1166870210585	15.8692502435638	14.1378078024042	8.81388455802561	19.1996938336207	0	18.3790991276592	20.5834935624679	18.4148065244586	15.2311833652567	17.6017074260395	19.6961824788472	17.937487618457	15.6097418031689	0	11.061829945412	0	14.278940754463	13.1932951679722	0	0	11.2630785308215	12.0294965519073	11.7776638321014	8.43424627059531	16.5399122091374	0	16.7887872311991	11.4549785050154	14.945026052202	0	13.7938731484842	0	19.0745372829141	8.58997886114189	11.278354367257	9.14526837523247	16.459333016299	14.3960057042373	13.1127513293271	14.8607336732135	15.658619928311	13.8668574509154	0	14.4675690417754	0
CFS-R	10.619643001145	0	12.6478986120719	14.7889605259003	16.1659530945648	14.3257331999733	8.81388455802561	18.940026974032	0	18.0569675754315	20.5418995705173	18.2193209322152	15.2788719731192	18.7658386436131	19.8611448945033	16.6265861303958	15.4535814072656	0	9.74337748410739	0	14.7933865794775	10.9113724775713	0	0	11.2630785308215	12.5953067405279	11.6935873118741	9.21233837463886	16.4126099802974	0	15.8067485577628	11.5162100647614	14.9856425673895	0	13.299553457329	0	18.1980255483731	8.58997886114189	11.8160551069706	9.14526837523247	16.0266313562482	14.2140926993775	12.3251037908624	14.9900648502075	15.7926732197545	13.9327031971487	0	15.5358273717192	0
Control	10.6628905288731	0	10.5132123624567	15.4788859358823	16.285698838683	13.9245927396238	8.81388455802561	19.1996810772691	0	19.334796211654	20.6433857762951	18.337339971136	15.4861839173878	19.0523573643659	20.336491394016	17.4114687240983	15.5038816396849	0	11.5174950086846	0	14.6918938769609	12.906178061324	0	0	11.9562257113814	12.3791936736324	11.7264711033248	8.43424627059531	16.2498715285677	0	16.4204995978659	11.5127854551693	15.0572671782163	0	13.0888810481875	0	18.9868707883143	8.58997886114189	11.9125602765491	9.14526837523247	16.375502339235	14.6352331190952	13.0757119245605	15.2303134126631	15.9403401737385	14.2908940646826	0	15.2591061421708	0
Control	11.0489834271031	0	13.0891271216116	14.8768352238554	15.3382666391026	14.2345340016935	8.81388455802561	19.3480871669875	0	18.2712254999592	20.6084317023791	18.1968087648991	15.5639983332181	18.9395482191768	19.9876969475887	17.620304169135	15.3347655238403	0	9.97627322226178	0	14.3663715629514	11.5578032237483	0	0	11.2630785308215	14.0256904428866	11.9985871150727	9.25387867399067	17.1925189302067	0	16.6154413068247	10.295934963563	15.0772808385529	0	13.4522755724985	0	18.8780679130662	8.58997886114189	10.8639482681548	9.14526837523247	16.444653978206	14.4330523380919	12.9108321414183	15.3302827828643	16.1090919389202	14.6587767305809	0	14.5174450170565	0
Control	9.81580322189124	0	13.0885852663854	14.8728462349005	15.4940408569335	13.8090145042206	8.81388455802561	19.4470034794736	0	18.3975803730721	20.6981048761481	18.4557107267101	15.6094546391889	18.2618435344805	20.1995439375399	17.6259984991339	15.6257060348146	0	10.5467877607015	0	14.5144056873697	10.7320393701023	0	0	11.2630785308215	12.4446445651216	12.0117534034826	8.43424627059531	17.3624834165777	0	16.562009443513	11.0545025199973	15.1282923850066	0	13.4830068363602	0	18.9984896349025	8.58997886114189	11.1883304144949	9.14526837523247	16.8471847618716	13.6705888267444	12.7566707532728	15.022898324663	15.5902939115459	13.9288678142917	0	14.1996355774881	0
Control	10.2222685028399	0	14.4052996610925	14.958612028793	15.0115535039071	14.5489821692802	10.3362759562932	19.2119323195858	0	18.3500469268503	20.5278969888199	18.4787176912132	14.9270413752855	18.6480758127445	20.1756007656291	17.5519010013093	15.4572239674301	0	10.8590374583624	0	14.781356494623	13.1467944923925	0	0	11.2630785308215	12.1910605254097	11.8713129416873	9.33060920436713	17.5036589198954	0	16.6726404316138	10.9706091741129	14.8743953917739	0	13.3080924553316	0	18.4751120999702	8.58997886114189	11.0614059471016	9.14526837523247	17.1829197608341	12.7871731186982	12.2459133587514	15.223699963591	15.7547489286919	13.2637240411432	0	12.6929456828189	0
Control	10.4727707458737	0	13.8890193506458	15.7890789526133	15.7430959728155	14.9740532667623	8.81388455802561	19.2408797915271	0	18.5392630867443	20.6994451282623	18.2207632181201	14.916355020145	18.2360397874292	19.9876470332268	17.2913428205584	15.8972502069715	0	10.392680876175	0	14.4762249352955	10.037187680924	0	0	11.2630785308215	11.8686960000545	11.6317124409543	8.43424627059531	17.2742908577961	0	16.5733841036069	10.5398791792736	15.223369229	0	13.5538145701502	0	18.1368987230696	8.58997886114189	10.2580803302705	9.14526837523247	16.7320786753053	14.4356552320412	12.9106542037158	14.6443317715545	15.7759169835871	14.4676310355526	0	14.1938908277237	0
Control	10.528757310693	0	13.1040140535509	15.3600770938706	15.9537211185409	14.9986652615754	8.81388455802561	19.5170673710055	0	18.6537325658293	20.660986260072	18.2497637314177	15.1321967690665	18.6968994068746	20.2131317456834	18.1080631084001	15.6307913850259	0	12.6667611483877	0	14.5652285075125	10.7303348614839	0	0	11.2630785308215	13.0063530196257	10.4281864952346	11.1876384399873	16.9204753263803	0	16.8530528337981	9.35625724687634	15.0857970880692	0	13.7081246592689	0	17.5456023224153	8.58997886114189	11.5474911294075	9.14526837523247	16.5849880704062	15.6852637139787	13.1984610830106	15.4533250206573	15.6699549564895	14.6771064271981	0	15.4874542393945	0
Control	11.006987875277	0	13.2056009759744	15.7548271601435	15.8245658471383	14.3570316193104	8.81388455802561	19.1234837615114	0	18.0053383759213	20.618952407347	18.3200719874506	15.1046192316143	18.3825709950497	19.9831369044535	17.6695535839245	15.5411369910467	0	11.6843967027098	0	14.5776636099267	12.3372105510484	0	0	11.2630785308215	12.6317585941248	11.3912322946915	10.6829271016611	16.9681442674018	0	16.3185963774311	10.7378521375114	14.6406399317588	0	13.0171406300338	0	19.1256987071466	8.58997886114189	10.685057613446	9.14526837523247	17.0764601375739	14.4088346408073	12.7683050072488	15.2733848412678	16.2385382579286	14.3171678810118	0	14.7414157227	0
Control	10.0255281784452	0	13.9217220114718	16.0068331975232	16.0514920657095	14.3682260219004	8.81388455802561	19.1742384857724	0	18.2487811176821	20.6012018326307	18.1787827473073	15.2707132536646	18.1051800433441	19.743916706679	18.1583382292483	15.7303277199467	0	12.7330146991422	0	14.416754598164	11.9842719421919	0	0	11.2630785308215	11.7262206802296	10.6858582448437	8.43424627059531	16.3884301455124	0	16.1257959275845	10.245515754728	14.9633386344969	0	13.3685873155418	0	18.9931869212544	8.58997886114189	11.6039355033136	9.14526837523247	16.9489512756039	13.8556145347715	13.5671261187843	15.0115066326044	15.6581953705609	14.0776871125077	0	14.6687869398949	0
Control	10.5704704130754	0	11.7228297628499	14.8863719957281	15.4230715100098	13.9628126971238	8.81388455802561	19.3929346636684	0	18.9255921873801	20.7201876552023	18.5435284701614	15.3128056736475	18.1123080764777	20.7087515808925	17.5366837118525	15.5965290488598	0	10.1634643538957	0	14.4152093245578	11.9938628522372	0	0	11.2630785308215	12.2877171465706	11.2688774295385	8.43424627059531	16.4881756246674	0	16.0921903884051	10.411810046084	14.8982576574428	0	13.4128874076657	0	19.0048456136206	8.58997886114189	11.4757115368762	9.14526837523247	16.4306733885546	14.2548526396683	13.1996688036775	14.9583266364315	16.0703308609131	14.572172298092	0	14.8565957766118	0
Control	8.97392159346194	0	13.5679564792699	15.1100086582289	15.6553766244498	15.0830402455289	8.81388455802561	19.4154045367135	0	18.3045879540255	20.4715775227789	18.1312780186929	14.4855533764959	17.8784510334541	19.9674111193074	16.4525051186767	15.5202451955667	0	10.4275649819779	0	14.683409046488	12.2932773371667	0	0	11.2630785308215	11.1650828296767	10.5297467875544	10.7992898219829	16.8742484283275	0	16.5479117848674	10.8384822692041	14.5308213021059	0	13.0899992639542	0	18.7133180588861	9.37084226863021	11.1543200875145	9.14526837523247	16.9962379361959	14.7606390554965	12.6518540202998	14.7006057288378	15.8058700348048	14.0198145540795	0	15.0029197397501	0
Control	8.97392159346194	0	14.3189912738131	14.9854914272197	16.0870513238709	14.5256829830494	8.81388455802561	18.8586330678123	0	18.4770139779806	20.5680263490828	18.5098661418783	15.0040954736789	18.6113298386853	20.6992510084335	16.8670953319132	15.4776746876614	0	9.35988043924576	0	14.1966508691629	12.9686899170231	0	0	11.2630785308215	11.2882682686732	11.0798167694252	8.43424627059531	16.1345070443192	0	16.0311513989885	11.2856734856115	14.5184075542261	0	13.1673252707059	0	19.0143679497068	8.58997886114189	11.5213994590496	9.14526837523247	16.5217878550672	14.5930214050868	12.6638328793586	15.0630935621508	15.9087985436531	14.2176166977159	0	15.5294742377508	0
Control	10.5885017498659	0	13.7364413762605	15.0270267393468	16.2115980158313	13.9633519474409	9.51569044208137	19.6771117967932	0	18.7064890144332	20.7427092497328	18.44483740807	15.2949732613366	18.3755231769056	20.2765573471094	16.9790998206904	15.5590836557034	0	12.3696657478976	0	14.8345073254795	12.6046742536169	0	0	11.9955676402619	12.5765942800401	12.416981659176	10.2440585207263	17.1171458030523	0	16.6326920165333	10.957764738495	14.7237876663562	0	12.7701356726786	0	19.0545468971684	8.58997886114189	11.7471039073044	9.14526837523247	16.3957283724046	14.4685016680606	13.4874411187501	15.4194572210478	16.0847940572029	14.1336871597769	0	15.2145207294022	0
Control	10.5153975623355	0	14.2725410234475	15.4028823954361	15.5211422597048	13.9362802402592	8.81388455802561	19.2281206360681	0	18.8932724649475	20.4969429443788	18.2191749854777	15.3031102736792	19.0341052006385	19.9282956408351	16.9362082784611	15.3412096237445	0	11.0913157309136	0	14.0604938758829	10.037187680924	0	0	11.2630785308215	12.1205801145098	12.164474308067	9.98704714563506	16.2488136898118	0	16.2355867328892	10.4945466350123	14.6865720978749	0	12.4676904776402	0	18.5388183567388	8.58997886114189	10.8206179318077	9.14526837523247	16.6342551443166	14.7844483874208	13.2288095035738	15.4997753840517	15.6353879860922	13.2625391471846	0	14.6551059733944	0
Control	10.6619307797387	0	13.1955915340625	15.5704521582287	15.4994448099848	14.6135563475196	9.50703173858555	19.8076495076117	0	18.8931972881808	20.6812514985333	18.3925083424131	15.3542064271449	18.8459571525217	20.4673853804924	17.4793469868505	15.7591834920336	0	11.7393595963825	0	14.7241335678503	10.037187680924	0	0	11.2630785308215	13.1684107358999	12.1229627388072	11.162913985047	17.3672565397471	0	16.9264189164741	9.77195416257428	14.8864713776072	0	13.6371945681648	0	17.9856155025485	8.58997886114189	10.8055373621199	9.14526837523247	16.9512439626768	13.8627643043529	12.8428796068494	15.1846379055048	15.613344042953	14.2672986623003	0	13.8187034552384	0
Control	11.053220620712	0	13.6127638201278	17.7025157309238	15.841430930649	14.2982095095008	8.81388455802561	19.6139943756061	0	17.5266680533996	20.5722971575153	17.6517916324394	14.5898311912799	18.2594505718852	20.2098880809263	17.5086978201352	15.7754137743679	0	13.1734594523454	0	15.2274997122506	14.0619260058125	0	0	11.2630785308215	13.3586853111293	11.0382710375091	10.640244837224	16.4433593054601	0	16.0207780376069	11.9095650760291	15.0094415112492	0	14.4256510592902	0	19.4034561943927	9.28312604170183	9.95037113843498	9.14526837523247	17.0420110014112	14.6845633403602	13.0698862246382	15.0127849781221	15.9055067033332	14.4833532637844	0	14.3849521994161	0
Control	10.3322133542188	0	14.3722685520082	15.9776857987349	16.3673077263989	14.9468639585916	10.1212566875129	19.6482564453932	0	18.9190702548274	20.8373559287385	18.5027610850095	15.0536636051279	18.4849404637284	20.400408359053	17.0783246048683	15.9651636782058	0	9.74255559842064	0	14.2743818267851	13.3501951219468	0	0	11.2630785308215	11.7053211073357	11.5024609019223	11.4156764067554	17.1706116088276	0	16.5339449891711	10.3652699801228	15.1064687139412	0	12.1857831997571	0	18.7123714386315	8.58997886114189	12.3233399926865	9.14526837523247	16.3683102524292	14.7141768884847	12.8626310463595	15.4619232016831	15.6819802346326	14.1108809990198	0	15.1215743187599	0
Control	11.8417038943015	0	13.5025079424817	15.3669413200129	16.3936019485924	15.1847312398198	8.81388455802561	19.8693749713858	0	18.8978723774863	20.8386308840677	18.4669763707776	15.5187089045124	19.1534554971947	20.5600300905968	17.6837860854822	15.944971745786	0	11.8351901071522	0	14.9750846664931	12.8531261481318	0	0	11.2630785308215	11.6340540092777	11.5359483917278	8.43424627059531	16.9873583791459	0	17.0366399616152	9.92842403782616	14.6070753579604	0	13.4251946195349	0	19.0262869109263	8.58997886114189	11.8851784388723	9.14526837523247	16.5027836691358	15.0139165965612	13.1263593827297	15.2474360511427	15.944401689202	14.0537405347183	0	15.6432769277316	0
Control	11.7478394718834	0	13.7611768567469	17.2067686077128	17.0603558774229	14.9212834813182	9.5915127875153	19.5263066893274	0	18.6411773471884	20.6766725517702	18.3367845134879	15.2716853965324	18.7892660352702	20.1555777573053	17.4112515848112	15.9007885344746	0	8.66673325868581	0	15.2695233788534	12.9102784534469	0	0	11.2630785308215	12.3587164763448	10.880158170399	13.5185132329544	16.8700845001119	0	16.6779246733005	12.0831137381297	15.2447188040751	0	13.7547558026808	0	18.5246108740964	8.58997886114189	12.6950758836607	10.9743517320015	17.4401169223773	14.8715531452062	13.2146654008762	15.0036828896784	15.7636939783222	14.446600403364	0	15.8069518247652	0
[truncated: 216 more columns]
